# Supplementary material
Source: publisher site journal article supplement (https://www.dovepress.com/article/299570)
Supplement: Supplementary file 1 [file get_supplementary_file.php]

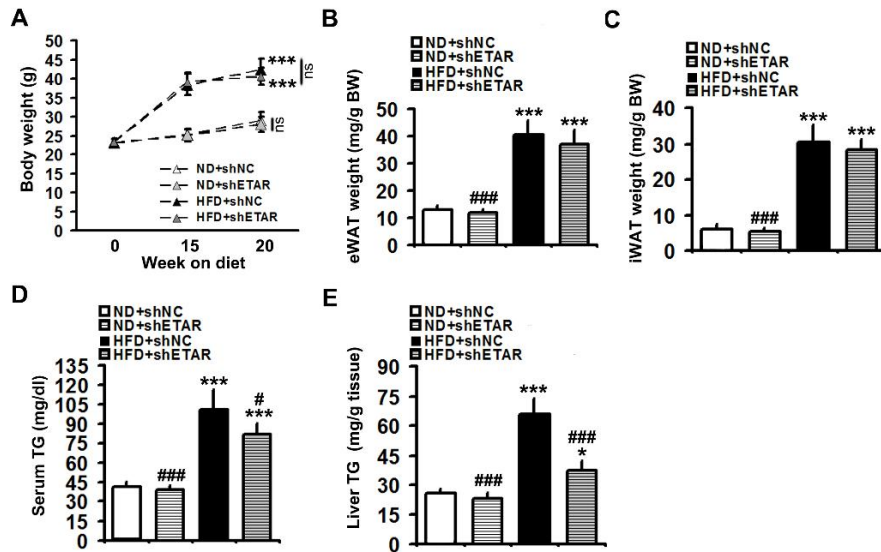

Supplementary Figure 1: The effects of hepatic ETAR knockdown on obesity and TG content in HFD-fed mice. (A) Body weight in mice, n = 10. (B) The weight of epididymal white adipose tissue (eWAT) in mice, n = 10. (C) The weight of inguinal WAT (iWAT) in mice, n = 10. (D) Serum TG content in mice, n = 5. (E) Liver TG content in mice, n = 5. All of the values are expressed as the mean  $\pm$  SD. \* $P < 0.05$ , \*\*\* $P < 0.001$  versus the ND + shNC group; # $P < 0.05$ , ### $P < 0.001$  versus the HFD + shNC group.

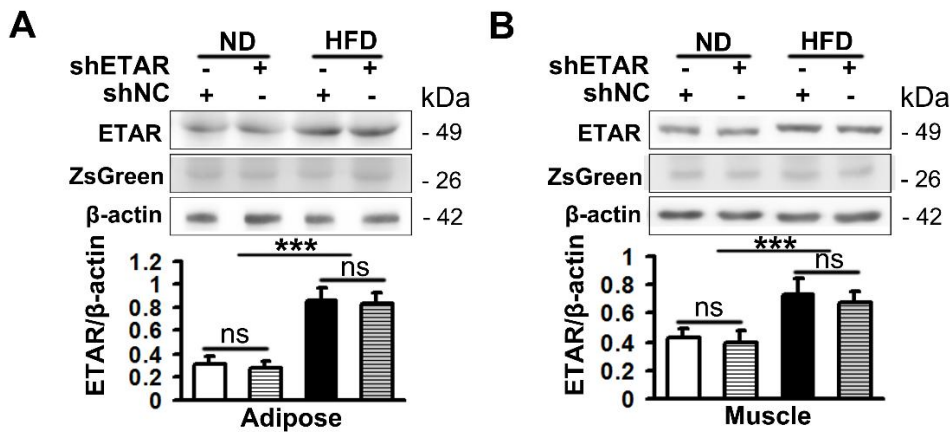

Supplementary Figure 2: The protein expressions of ETAR are not significantly decreased in other metabolic tissues of AAV8-shETAR-injected mice (n = 5). (A) Protein expression of ETAR in mouse adipose tissues. (B) Protein expression of ETAR in mouse muscles. All of the values are expressed as the mean  $\pm$  SD. \*\*\* $P < 0.001$  versus the ND + shNC group.

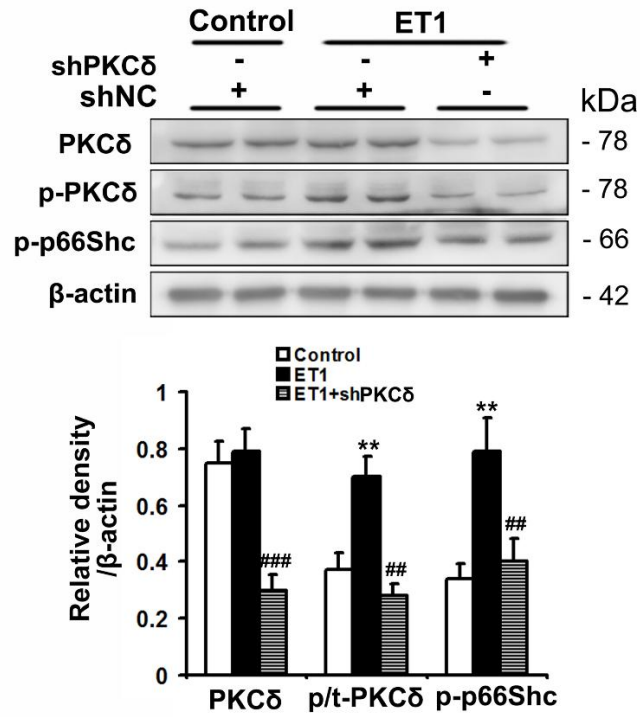

Supplementary Figure 3: The knockdown efficiency of Ad-shPKC $\delta$  in L02 cells. L02 cells were infected with Ad-shPKC $\delta$  followed by the treatment of 50nm ET1. Protein expression of total PKC $\delta$ , p-PKC $\delta$  and p-p66Shc were analyzed by Western blotting in L02 cells. All of the values are expressed as the mean  $\pm$  SD. \*\*P < 0.01 versus the control cells. ##P < 0.01, ###P < 0.001 versus the ET1-treated cells.
